# Supplementary material for: Odorless Glutathione Microneedle Patches for Skin Whitening
Source: MDPI journal article supplement (doi:10.3390/pharmaceutics12020100), 2020-01-27
Supplement: s1 [file s1]

## Supplementary Materials: Odorless Glutathione Microneedle Patches for Skin Whitening

Yechan Lee, Sujeet Kumar, Sou Hyun Kim, Keum-Yong Seong, Hyeseon Lee, Chaerin Kim, Young-Suk Jung and Seung Yun Yang

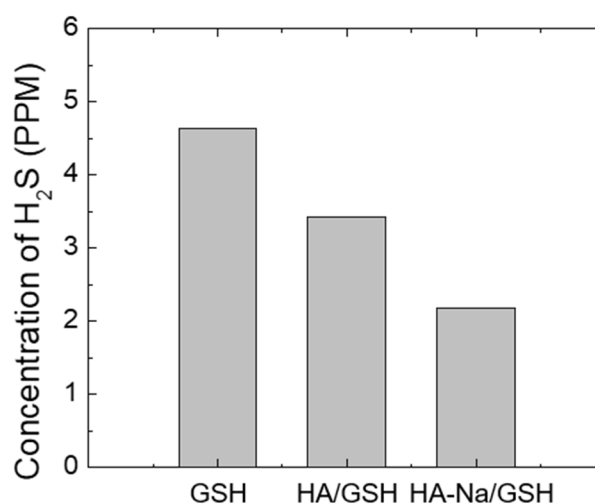

**Figure S1.** The odor-reducing effect of HAs through GC analysis results in released H<sub>2</sub>S from GSH (2.5%), hyaluronic acid (HA/GSH<sub>2.5</sub>) and sodium hyaluronate (HA-Na/GSH<sub>2.5</sub>) formulations.

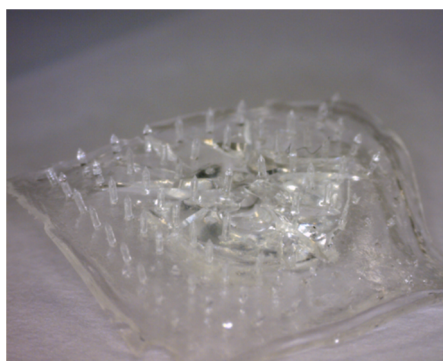

**Figure S2.** Photographic image of the GSH<sub>5</sub>-HA MN array.
